# Supplementary material
Source: MDPI journal article supplement (https://www.mdpi.com/2071-1050/9/6/1017)
Supplement: s1 [file s1]

# Supplementary Materials: Effect of National-Scale Afforestation on Forest Water Supply and Soil Loss in South Korea, 1971–2010

Gang Sun Kim, Chul-Hee Lim, Sea Jin Kim, Jongyeol Lee, Yohwan Son and Woo-Kyun Lee

**Table 1.** Input data information and sources in this study

| Variables                        | Content                                                           | Time scale  | Source                                                                                        |
|----------------------------------|-------------------------------------------------------------------|-------------|-----------------------------------------------------------------------------------------------|
| <b>Topographical data</b>        | Slope, aspect, elevation                                          | -           | National Geographic Information Institute (NGII)                                              |
| <b>Land cover data</b>           | Land cover                                                        | 1997        | Ministry of Environment (ME)                                                                  |
| <b>Forest data</b>               | Forest stock cover                                                | 1971– 2005  | Simulated from 5th National Forest Inventory (NFI) and forest scenario from Lee et al. (2014) |
| <b>Weather data</b>              | Precipitation, Relative humidity, Temperature                     | 1971 – 2010 | Korea Meteorological Administration(KMA) Climate Forecast System Reanalysis (CFSR)            |
| <b>Evapotranspiration</b>        | Potential Evapotranspiration                                      | 1971 – 2010 | Global Land Data Assimilation System (GLDAS)                                                  |
| <b>Soil &amp; Plant (InVEST)</b> | Depth to root restricting layer<br>Plant available water fraction | -           | Constructed from Song et al.(2015)                                                            |
| <b>Soil map (SWAT)</b>           | Soil series (Soil depth, Organic carbon etc.)                     | -           | Soil Information System (SIS) of RDA                                                          |
| <b>Watershed</b>                 | Watershed, Sub-watershed                                          | -           | Water Resources Management Information System (WAMIS)                                         |
